# Supplementary material
Source: publisher figshare collection journal article supplement (https://geolsoc.figshare.com/articles/dataset/_/3453713)
Supplement: Supplementary file 2 [file 1]

| Radial groups | Pit size              | Pit aperture      | Ray separate    | Most common ray width | Ray height                    | % strictly uniser | Comments                                                      | Ray cell length                   | Ray cell width     | Ray cell height    | Radial walls ray cells | Cross-field                                                             |
|---------------|-----------------------|-------------------|-----------------|-----------------------|-------------------------------|-------------------|---------------------------------------------------------------|-----------------------------------|--------------------|--------------------|------------------------|-------------------------------------------------------------------------|
| yes           | 6-13 (mean 9 $\mu$ m) | circular to oval  | 2-8 rows trachs | uniser                | 1 to 25 (mean 9)              | 89%               | some tall rays partly biseriate                               | 48-125 (74 $\mu$ m, n=35 sd = 16) | 9-25 (15 $\mu$ m)  | 16-28 (22 $\mu$ m) | vertical               | small oval pits, 2 in CF of small tracheids                             |
| yes           | 5-10 (mean 8 $\mu$ m) | circular to oval  | 1-7 rows        | uniser                | 1 to 20 (mean 7)              | 84%               | some tall rays partly biseriate                               | n = 5: 65-112 $\mu$ m             | 11-24 (18 $\mu$ m) | 13-31 (24 $\mu$ m) | vertical               | 1-4, often 2 (up to 6 seen)                                             |
| ?             | 6-9 (mean 7 $\mu$ m)  | circular to oval  | 1-8 rows        | uniser                | 1 to 23 (mean 8) (max obs 33) | 80%               | some tall rays partly biseriate, a few low rays are biseriate |                                   | 14-28 (19 $\mu$ m) | 15-36 (23 $\mu$ m) | vertical               | usual 2-4 small oval pits (min max 6), 7 x 5 $\mu$ m, not super crowded |
| not seen      | 6-11 (mean 8 $\mu$ m) | circular to oval  | 2-9 rows        | uniser                | 1 to 19 (mean 8)              | 96%               | some tall rays partly bi (very rare)                          |                                   | 8-31 (13 $\mu$ m)  | 10-33 (19 $\mu$ m) | vertical               | 4-6, oval to circular, crowded, probably up to 10 on largest trachs     |
| ?             | 4-10 (mean 6 $\mu$ m) | circular to oval  | 2-7 rows        | uniser                | 1 to 23 (mean 6)              | 92%               | some tall rays partly bi, rare                                |                                   | 7-18 (11 $\mu$ m)  | 10-20 (15 $\mu$ m) | vertical               | 1-6 pits, 3-4 more common, 6 x 4 $\mu$ m (n=23)                         |
| ?             |                       | circular to oval  |                 | uniser                | 1 to 20 (mean 6)              | 84%               | some tall rays partly bi                                      |                                   | 6-19 (11 $\mu$ m)  | 8-24 (17 $\mu$ m)  | vertical               | several, small                                                          |
| yes           | 5-11 (mean 7 $\mu$ m) | circular to oval? |                 | uniser                | 2 to 9 (mean 4)               | 88%               | some partly biseriate                                         |                                   | 6-17 (11 $\mu$ m)  | 11-26 (19 $\mu$ m) | vertical               | 4-6 crowded (5x4 $\mu$ m)                                               |
| yes?          | 5-10 (mean 7 $\mu$ m) | circular to oval  |                 | uniser                | 2 to 20 (mean 10)             | about 96%         | some partly biseriate but hard to estimate how many           |                                   | 11-21 (16 $\mu$ m) | 12-30 (18 $\mu$ m) | vertical               | several, crowded                                                        |

Supplemental File 1: Wood taxonomy for Late Permian specimens from Antarctica

| Specimen      | Tracheid diam. tang. (µm) | Tracheid diam. radial                                   | Ring boundary                                                      | Mixed radial pitting | Radial pitting uniser   | Radial pitting multiser                            |
|---------------|---------------------------|---------------------------------------------------------|--------------------------------------------------------------------|----------------------|-------------------------|----------------------------------------------------|
| <b>17,773</b> | 7-31 (mean 18 µm)         | 6-25 (mean 15 µm) prob biased towards smaller tracheids | none visible                                                       | yes                  | yes, <u>common</u>      | very rare                                          |
| <b>17,774</b> | 12-40 (mean 25 µm)        | 12-42 (mean 23 µm)                                      | none visible                                                       | yes                  | yes, <u>very common</u> | very rare                                          |
| <b>17,775</b> | 8-44 (mean 23 µm)         | 12-38 (mean 23 µm)                                      | yes (before boundary 21 µm at bound 9 µm after 33 µm_for 20 cells) | yes                  | yes                     | yes biseriate common, triseriate rare              |
| <b>17,776</b> | (compressed)              | (compressed)                                            | (compressed)                                                       | yes                  | yes, <u>very common</u> | rare, bi to triseriate                             |
| <b>17,169</b> | 11-31 (mean 19 µm)        | 11-50 (mean 22-29 µm)                                   | yes (before boundary 22 µm at bound 10 µm after 29 µm)             | yes                  | yes                     | yes, <u>numerous biseriate and some triseriate</u> |
| <b>11,617</b> | -                         | -                                                       | -                                                                  | yes                  | yes                     | yes, biseriate, subopposite (only a few seen)      |
| <b>11,472</b> | -                         | -                                                       | -                                                                  | yes                  | yes                     | biseriate <u>common</u>                            |
| <b>17,771</b> | -                         | -                                                       | -                                                                  | yes                  | yes                     | biseriate <u>common</u>                            |
